# Supplementary material for: Computational Design of Inhibitors Targeting the Catalytic β Subunit of Escherichia coli FOF1-ATP Synthase
Source: MDPI journal article supplement (doi:10.3390/antibiotics11050557), 2022-04-22
Supplement: s1 [file s1]

## Supplementary Information

# Computational Design of Inhibitors Targeting the Catalytic $\beta$ subunit of *Escherichia coli* FoF<sub>1</sub>-ATP synthase

Luis Pablo Avila-Barrientos <sup>1,†</sup>, Luis Fernando Cofas-Vargas <sup>1,†</sup>, Guillermin Agüero-Chapin <sup>2,3</sup>, Enrique Hernández-García <sup>1</sup>, Sergio Ruiz-Carmona <sup>4,†</sup>, Norma A. Valdez-Cruz <sup>5</sup>, Mauricio Trujillo-Roldán <sup>5</sup>, Joachim Weber <sup>6</sup>, Yasser B. Ruiz-Blanco <sup>1,7,\*</sup>, Xavier Barril <sup>8,9</sup> and Enrique García-Hernández <sup>1,\*</sup>

Universidad Nacional Autónoma de México, Instituto de Química, Ciudad Universitaria, Ciudad de México 04510, Mexico; lpablo@comunidad.unam.mx (L.P.A.-B.);

fcofas@comunidad.unam.mx (L.F.C.-V.); enrique.hernandez@iquimica.unam.mx (E.H.-G.)

<sup>2</sup> CIMAR/CIIMAR, Centro Interdisciplinar de Investigación Marinha e Ambiental, Universidade do Porto, Terminal de Cruzeiros do Porto de Leixões, Av. General Norton de Matos, s/n, 4450-208, Portugal; gchapin@ciimar.up.pt

<sup>3</sup> Departamento de Biologia, Faculdade de Ciências, Universidade do Porto, Rua do Campo Alegre, 4169-007 Porto, Portugal

<sup>4</sup> Institut de Biomedicina de la Universitat de Barcelona (IBUB) and Facultat de Farmàcia, Universitat de Barcelona, Av. Joan XXIII s/n, 08028 Barcelona, Spain; sruizcarmona@gmail.com

<sup>5</sup> Programa de Investigación de Producción de Biomoléculas, Departamento de Biología Molecular y Biotecnología, Instituto de Investigaciones Biomédicas, Universidad Nacional Autónoma de México, Cd. Universitaria, 04510 Ciudad de México, Mexico;

adri@biomedicas.unam.mx (N.A.V.-C.); maurotru@biomedicas.unam.mx (M.T.-R.)

<sup>6</sup> Department of Chemistry and Biochemistry, Texas Tech University, Lubbock, TX 79409, USA; joachim.weber@ttu.edu

<sup>7</sup> Center of Medical Biotechnology, Faculty of Biology, University of Duisburg-Essen, Essen, 45127, Germany

<sup>8</sup> Departament de Farmàcia i Tecnologia Farmacèutica, i Fisicoquímica, Institut de Biomedicina (IBUB), Universitat de Barcelona, Av. Joan XXIII, 27-31, E-08028 Barcelona, Spain; xbarril@ub.edu

<sup>9</sup> Catalan Institution for Research and Advanced Studies (ICREA), 08010 Barcelona, Spain

\* Correspondence: yasser.ruizblanco@uni-due.de (Y.B.R.-B.); egarciah@unam.mx (E.G.-H.)

† These authors contributed equally to this work.

‡ Current address: Cambridge Baker Systems Genomics Initiative, Baker Heart and Diabetes Institute, Melbourne, VIC, 3004, Australia.

## Table of content

|                  |                                                                                                       |
|------------------|-------------------------------------------------------------------------------------------------------|
| <b>Table S1</b>  | Docked organic molecules on the HTH with best scores according to rDock and DUCK methods              |
| <b>Table S2</b>  | Root peptides and mutation vectors for each peptide inhibitor family (IF1 and Heterogeneous Set)      |
| <b>Figure S1</b> | Distance between the carbonyl oxygen of G378 and the amino nitrogen of Compd-5 as a function of time. |
| <b>Figure S2</b> | Conservation of the HTH motif in Mammalia class                                                       |
| <b>Figure S3</b> | Conserved contacts between residues of the HTH motif and neighboring subunits                         |
| <b>Figure S4</b> | Conservation of the HTH motif in Bacilli class                                                        |

**Table S1.** Docked organic molecules on the HTH with best scores according to rDock and DUCK

| Comp. ID | SMILES                                                                         | Vendor         | Vendor ID    |
|----------|--------------------------------------------------------------------------------|----------------|--------------|
| 1        | <chem>Brc1cc(N2CC(CC2=O)C(=O)NCc2cc(NC(=O)c3ccnc3)ccc2)ccc1</chem>             | Enamine        | T6465774     |
| 2        | <chem>s1cccc1CNC(=O)CSc1nc(nc2sc3CCCCc3c12)COc1cccc1</chem>                    | Asinex         | ASN_05445348 |
| 3        | <chem>Clc1cc2c(N=C(NN=C2c2cc(OC)c(OCc3ccccc3)cc2)c2ccnc2)cc1</chem>            | Asinex         | ASN_4053622  |
| 4        | <chem>O=C(NCc1cn(nc1-c1cccc1)Cc1cccc1)CCn1ncnc1</chem>                         | Enamine        | T6020091     |
| 5        | <chem>o1c(C)c(cc1C)C(=O)Nc1cc(ccc1)-c1nnc(N2CCOCC2)cc1</chem>                  | Life Chemicals | F2724_2447   |
| 6        | <chem>Clc1cc(-n2c(nnc2SCC(=O)N2CCc3c2cccc3)CNC(=O)c2cc(OC)ccc2)ccc1</chem>     | Life Chemicals | F0507_2237   |
| 7        | <chem>S(CC(=O)Nc1cccc1OC)c1c2c(n(c1)CC(=O)N1CC(OC(C1)C)C)cccc2</chem>          | Life Chemicals | F2016_612    |
| 8        | <chem>O=C(NC1CC2[NH+](C(C1)CCC2)Cc1ccc(cc1)C)c1ccnc1</chem>                    | Asinex         | ASN_6224181  |
| 9        | <chem>S(CC(=O)N1CCc2c1cccc2)c1nnc(n1-c1cc(OC)ccc1OC)CNC(=O)c1cc(OC)ccc1</chem> | Life Chemicals | F0772_947    |
| 10       | <chem>s1cc(nc1C)CCNC(=O)CC(NC(=O)N)c1cccc1C</chem>                             | Enamine        | T6613814     |
| 11       | <chem>O=C1N=C(NC(=C1)CNC(=O)c1n(nc(c1)C(C)(C)C)c1cccn)cc1</chem>               | Asinex         | SYN_19815273 |
| 12       | <chem>Clc1cc(ccc1Cl)C[NH2+]C(C(C)C)C=1NC(=NC(=O)C=1)c1ccncc1</chem>            | Asinex         | SYN_19819116 |
| 13       | <chem>S(CC(=O)NCc1cccc1)c1c2c(n(c1)CC(=O)N1CCCCC1)ccc2</chem>                  | Life Chemicals | F2016_444    |
| 14       | <chem>O1CCN(CC1)c1nnc(cc1)-c1cc(NC(=O)c2cc(OC)ccc2)ccc1</chem>                 | Life Chemicals | F2724_260    |
| 15       | <chem>O=C1N=C(NC(=C1)C(NC(=O)C1(CC1)c1cccc1)C(C)C)c1ccncc1</chem>              | Asinex         | SYN_19818191 |
| 16       | <chem>Ic1cc(NC(=O)Cn2c3c([nH+])c2NCC(O)C)cccc3)ccc1</chem>                     | Enamine        | T6127320     |
| 17       | <chem>Clc1ccc(Cl)cc1S(=O)(=O)Nc1cc(ccc1)C(=O)Nc1cc(OC)ccc1</chem>              | Enamine        | T5262939     |
| 18       | <chem>Clc1ccc(cc1)-c1nn(cc1C1N(N=C(C1)c1cccc1O)C(=O)C)-c1cccc1</chem>          | Enamine        | T5806496     |
| 19       | <chem>S(=O)(=O)(Nc1cc(ccc1)-c1nnc(N2CCOCC2)cc1)c1ccnc1</chem>                  | Life Chemicals | F2588_215    |
| 20       | <chem>S(Cc1cccc1)C(C(=O)N1CCC(NC(=O)c2cc(OC)ccc2)CC1)C</chem>                  | Enamine        | T6604160     |
| 21       | <chem>o1cc(cc1)C(=O)NC(C(=O)Nc1cc(ccc1)Cn1nccc1)C</chem>                       | Enamine        | T6601933     |
| 22       | <chem>O1c2cc(CNC(=O)c3cc4c(nc3)n[nH]c4C)c(OCC)cc2CC1C</chem>                   | Enamine        | T6436978     |
| 23       | <chem>O1CCC(CC1(C)C)(CCNC(=O)c1cnc(nc1C)C)c1ccc(OC)cc1</chem>                  | Asinex         | SYN_15581643 |
| 24       | <chem>s1cc(nc1NC(=O)c1cc2nc[nH]c2cc1)-c1ccc(cc1)CCC</chem>                     | Enamine        | T5770195     |
| 25       | <chem>s1cc(nc1NC(=O)c1cc2nn[nH]c2cc1)-c1ccc(cc1)CC</chem>                      | Enamine        | T5957036     |
| 26       | <chem>Oc1c(cccc1O)C=N/c1cc2nc(n(c2cc1)C)CO</chem>                              | Enamine        | T0502_6866   |
| 27       | <chem>S(CC(=O)Nc1n(nc(c1)-c1cc(C)c(cc1C)C)-c1cccc1)c1nnnc1C</chem>             | Enamine        | T5237329     |

**Table S2.** Root peptides extracted from the MSA and their respective mutation vectors.

| <i>Inhibitor Class</i> | <i>Root Peptide/Mutation Vector</i>                                                                                                   |
|------------------------|---------------------------------------------------------------------------------------------------------------------------------------|
| <i>IF1</i>             | GSIREAGG[ET]DAFGKREAAEE[DE]RYFR                                                                                                       |
|                        | [0.15, 0.40, 0.60, 0.10, 0.64, 0.20, 0.10, 0.2, 1.0, 0.9, 0.2, 0.1, 0.2, 0.2, 0.3, 0.2, 0.6, 0.1, 0.5, 0.0, 0.5, 0.5, 0.15, 0.2, 0.3] |
| <i>IF1</i>             | EQLAALKKHHEEEIDHHKK                                                                                                                   |
|                        | [0.2, 0.0, 0.1, 0.5, 0.4, 0.0, 0.35, 0.4, 0.3, 0.4, 0.4, 0.4, 0.3, 0.4, 0.6, 0.3, 0.2, 0.6, 0.35]                                     |
| <i>Het. Inhibitors</i> | RVYGVGNILYEKA                                                                                                                         |
| <i>Het. Inhibitors</i> | SLKEIQEAIDLRELAKLKQKP-PAIDWMYGKANMAKAPNV                                                                                              |
|                        |                                                                                                                                       |
| <i>Het. Inhibitors</i> | TFEKPKEALKVPIPEDLDYKYTAQVDAEEKE                                                                                                       |
|                        |                                                                                                                                       |
| <i>Class-4</i>         | MENLNMDLLYMAAAVMMGLAAIGAAI-GIGILGGKFLEGAAR                                                                                            |

Root peptides summarize structural information of the two most conserved regions within both inhibitor classes. Mutation vectors represent the root peptides by weighting each residue with its variability or conservation degree shown in the consensus fragments (Figure 5 in the manuscript). “Zero” value indicates no mutations (high conservation degree) while “one” value represents high mutation probability.

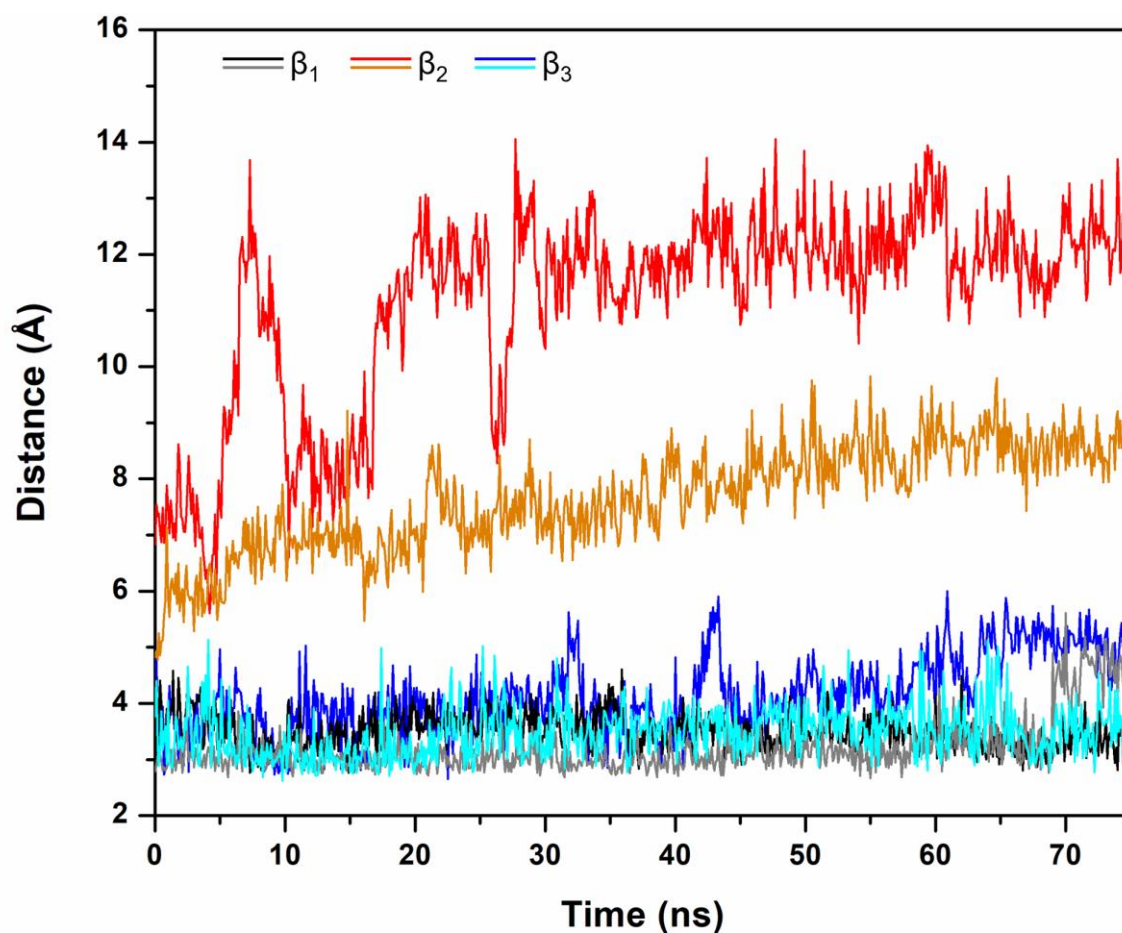

**Figure S1.** Distance between the carbonyl oxygen of G<sup>378</sup> and the amino nitrogen of Compd-5 as a function of time. Two replicas of 75 ns were run with EcF1 bound to three Compd-5 molecules. The Compd-5 pose in  $\beta_1$  obtained by HTVS was transferred to  $\beta_2$  and  $\beta_3$ . Two MD simulations were carried out.

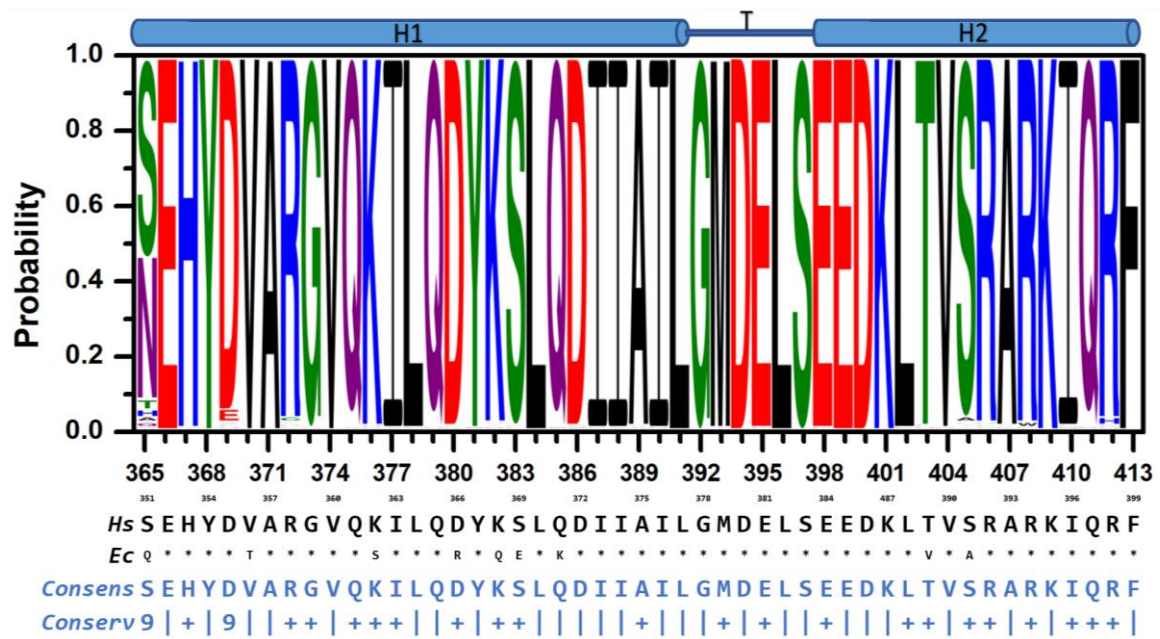

**Figure S2.** Conservation of the HTH motif in the Mammalia class. Residue numbering in the up and down rows corresponds to the human and *E. coli* sequences, respectively. Multiple sequence alignment of 142 entries was performed with Clustal Omega [1]. Logos were generated using the Weblogo3 server [2]. Consensus, human (*Hs*) and *E. coli* (*Ec*) sequences are shown in the x-axis for comparison. *E. coli* residues identical to human residues are shown with asterisks. The *Conserv* row corresponds to a conservation scale ranging from 0 (null conservation) to 10 (=+, complete conservation of physicochemical properties of the amino acid group) as defined in [3]. Absolute residue conservation is indicated by the symbol |.

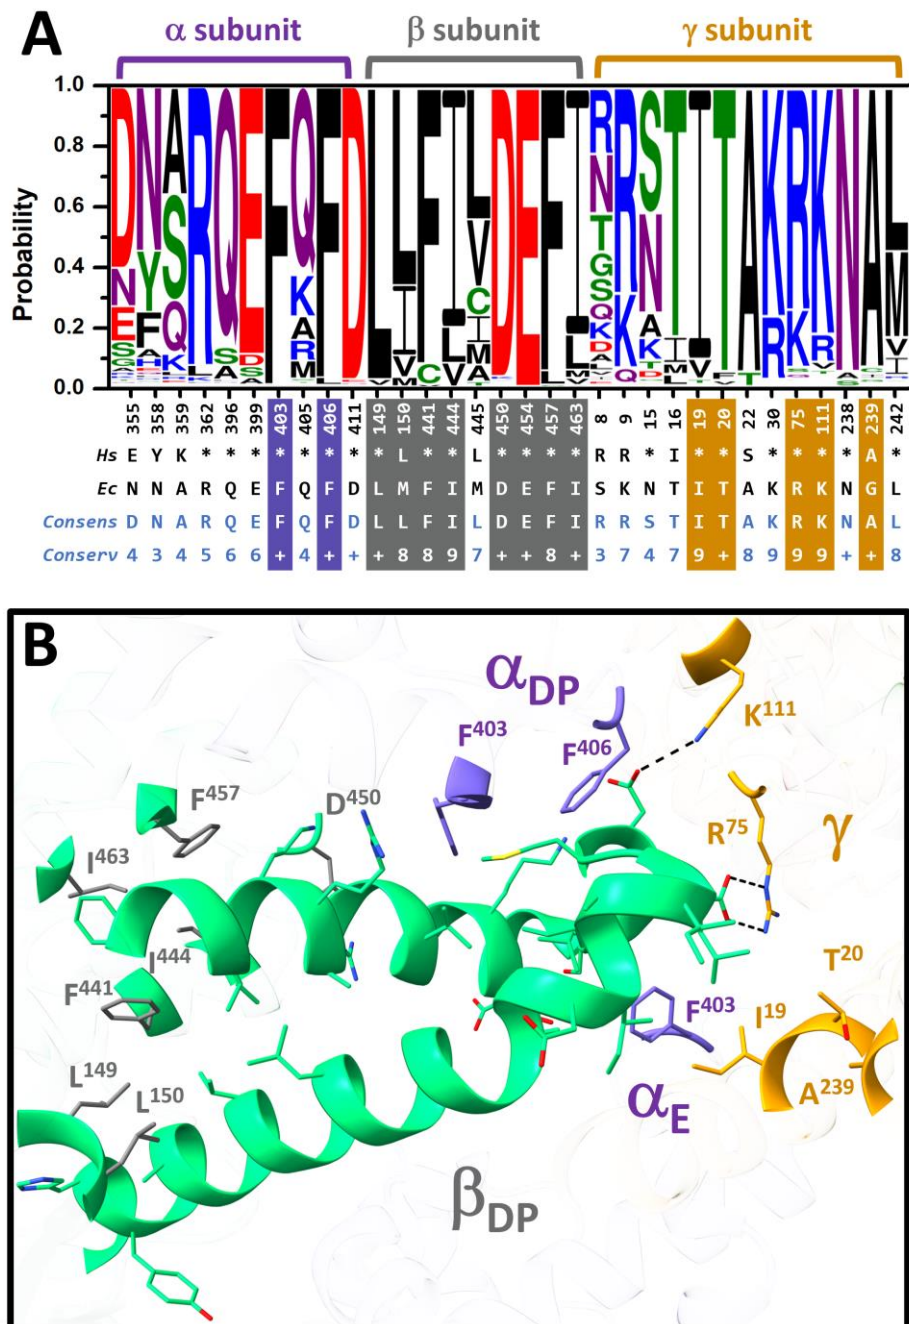

**Figure S3.** Conserved contacts between residues of the HTH motif and neighboring subunits in bacteria. The contacts were determined from the crystallographic structure of BsF1 in the so-called “ground state (pdb 2jdi, [4]). **A.** Logo graphic showing the residues of the  $\alpha$  (purple),  $\beta$  (gray) and  $\gamma$  (ocher) subunits that contact the HTH motif. The residue numbering corresponds to that of the human/bovine enzyme. Highly conserved residues are highlighted. **B.** Schematic representation of conserved HTH residues (green) contacting conserved residues of neighboring subunits. The intrachain contacts of the  $\beta$  subunit are shown in gray.

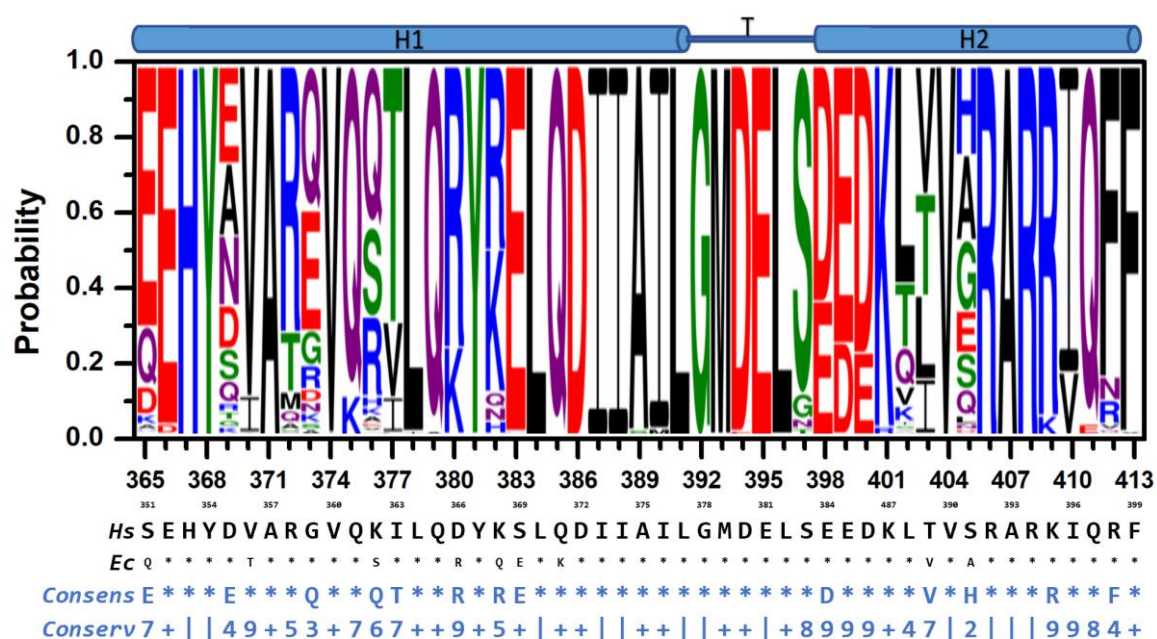

**Figure S4.** Conservation of the HTH motif in the Bacilli class. Residue numbering in the up and down rows corresponds to the human and *E. coli* sequences, respectively. Multiple sequence alignment of 444 entries was performed with Clustal Omega [1]. Logos were generated using the Weblogo3 server [2]. Bacilli consensus, *E. coli* (*Ec*) and human (*Hs*) sequences are shown in the x-axis for comparison. *E. coli* residues identical to human residues are shown with asterisks. The *Conserv* row corresponds to a conservation scale ranging from 0 (null conservation) to 10 (=+, complete conservation of physicochemical properties of the amino acid group) as defined in [3]. Absolute residue conservation is indicated by the symbol |.

## References

1. Sievers, F.; Wilm, A.; Dineen, D.; Gibson, T.J.; Karplus, K.; Li, W.; Lopez, R.; McWilliam, H.; Remmert, M.; Söding, J.; et al. Fast, scalable generation of high-quality protein multiple sequence alignments using Clustal Omega. *Mol. Syst. Biol.* **2011**, *7*, 539. <https://doi.org/10.1038/msb.2011.75>.
2. Crooks, G.E.; Hon, G.; Chandonia, J.-M.; Brenner, S.E. WebLogo: A Sequence Logo Generator. *Genome Res.* **2004**, *14*, 1188–1190. <https://doi.org/10.1101/gr.849004>
3. Livingstone, C.D.; Barton, G.J. Protein sequence alignments: A strategy for the hierarchical analysis of residue conservation. *Comput. Appl. Biosci.* 1993, *9*, 745–756. <https://doi.org/10.1093/bioinformatics/9.6.745>.
4. Bowler, M.W.; Montgomery, M.G.; Leslie, A.G.W.; Walker, J.E. Ground state structure of F<sub>1</sub>-ATPase from bovine heart mitochondria at 1.9 Å resolution. *J. Biol. Chem.* **2007**, *282*, 14238–14242. <https://doi.org/10.1074/jbc.M700203200>.
